# Supplementary material for: DFT studies of selective oxidation of propene on the MoO3(010) surface
Source: Royal Society of Chemistry journal article supplement (doi:10.1039/d0cp03732j), 2021-01-01
Supplement: d0cp03732j1.pdf [file d0cp03732j1.pdf]

## Supporting Information

### DFT Studies of Selective Oxidation of Propene on MoO<sub>3</sub>(010) Surface

Yanhua Lei<sup>a,b\*</sup>, Min Yan<sup>b</sup>

<sup>a</sup> Institute of Theoretical and Computational Chemistry, Key Laboratory of Mesoscopic Chemistry of MOE, School of Chemistry and Chemical Engineering, Nanjing University, Nanjing, 210023, People's Republic of China

<sup>b</sup> Hunan Provincial Key Laboratory of Xiangnan Rare-Precious Metals Compounds and Applications, Department of Chemistry and Life Science, Xiangnan University, Chenzhou, Hunan Province, 423000, People's Republic of China

\* To whom correspondence should be addressed. E-mail: leiyh\_1823@xnu.edu.cn

#### Path 1-a3

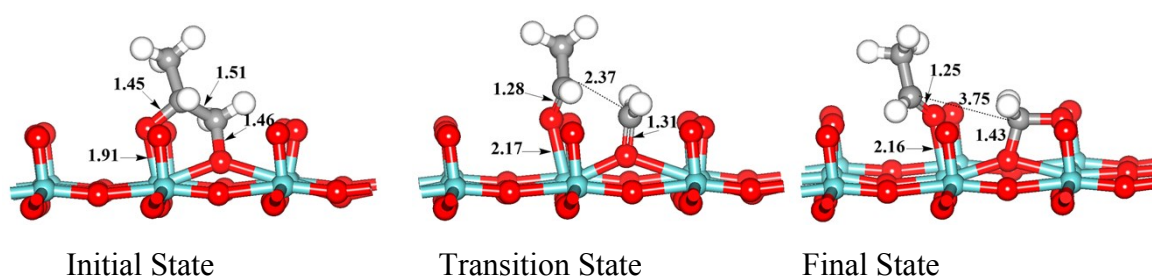

**Fig. S1** C-C bond cleavage from the di- $\sigma$  bonded propene.

**Path 1-b1**

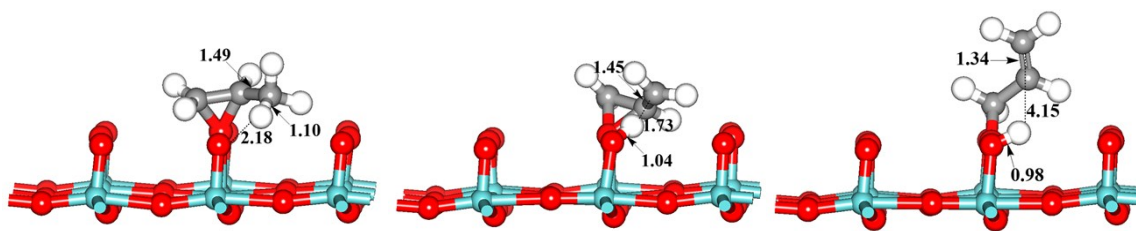

**Path 1-b2**

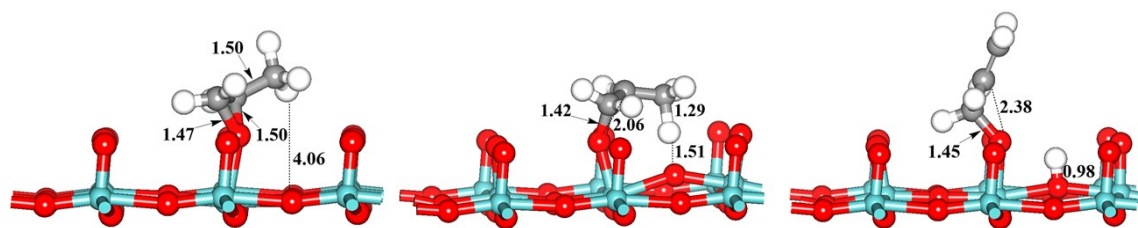

Initial State

Transition State

Final State

**Fig. S2** Dehydrogenation from the  $\pi$ -bonded propene.

**Path 1-c1**

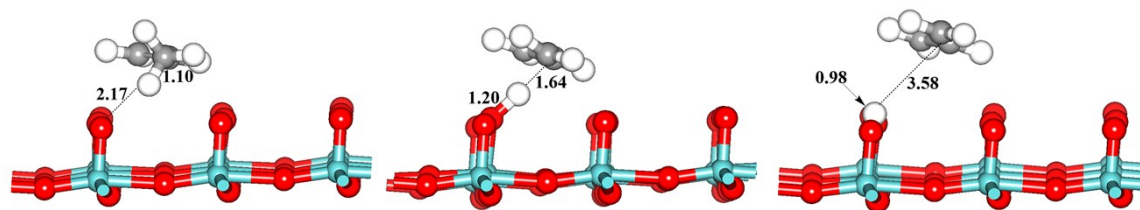

**Path 1-c2**

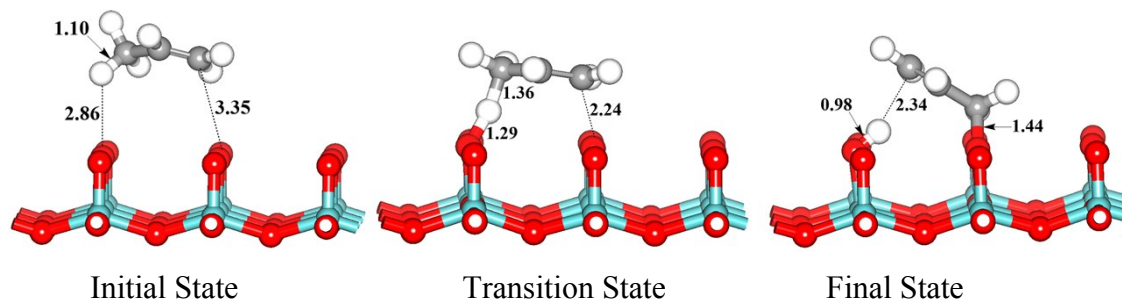

**Fig. S3** The first hydrogen abstraction from physically-adsorbed propene.

**Path 2-b1**

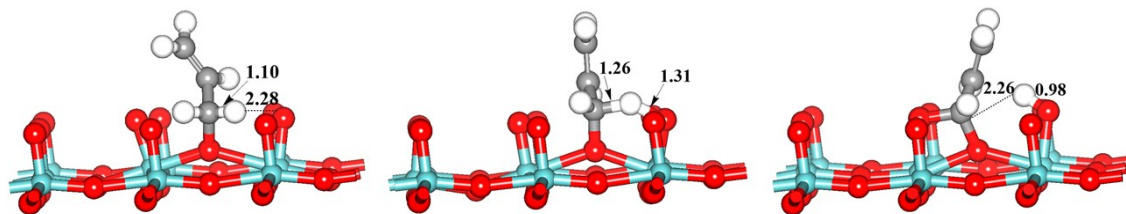

**Path 2-b2**

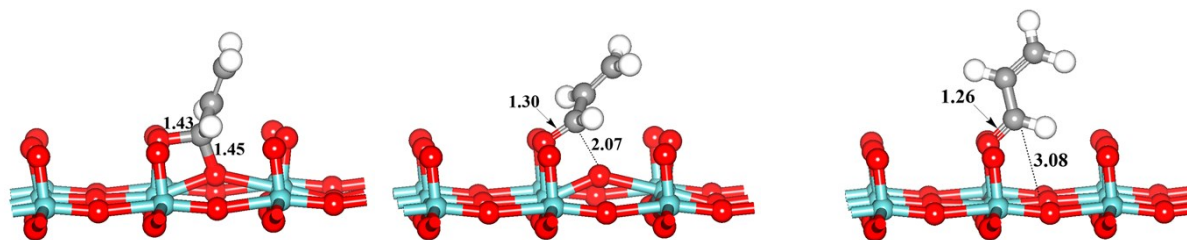

Initial State

Transition State

Final State

**Fig. S4** Hydrogen abstraction of allyl on the asymmetric oxygen atom of MoO<sub>3</sub> (010) surface.

### Path Def-a3

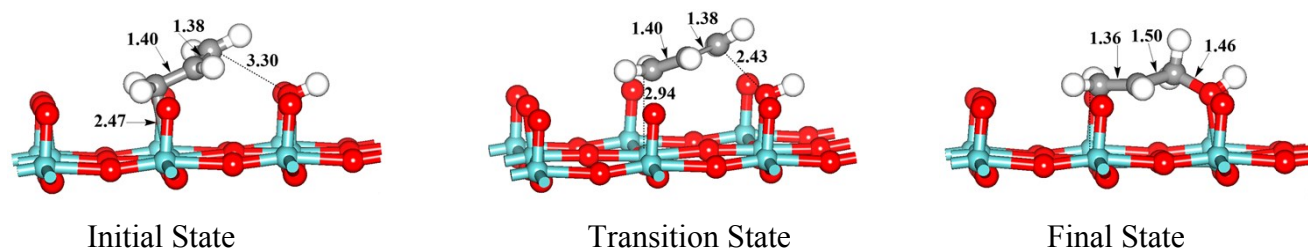

**Fig. S5** Allyl migration from defective Mo atom to the hydroxyl group.

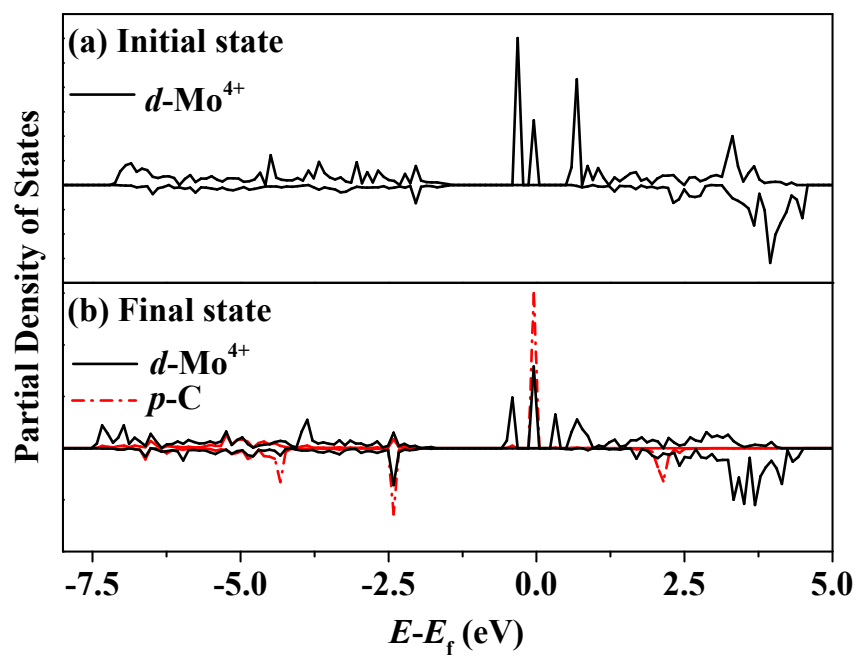

**Fig. S6** The partial density of states for the initial state and final state in the first hydrogen abstraction of propene.
